# Supplementary material
Source: ML conference proceedings conference paper supplement (https://openreview.net/forum?id=p6wiThIOS5m)
Supplement: supplementary_material [file attachment]

## A EXAMPLES

This section gives additional examples of Low-rank Multi-task Bilinear class and demonstrates the sample complexity of multi-task learning in these examples.

**Low Occupancy Complexity** Low occupancy complexity model is proposed in Du et al. (2021). We consider the low occupancy complexity model with known feature  $\beta_h$ , as defined in the following.

**Definition A.1** (Low Occupancy Complexity). An MDP  $\mathcal{M}$  and hypothesis class  $\mathcal{H}$  has low occupancy complexity with respect to an unknown feature mapping  $\phi_h : \mathcal{S} \times \mathcal{A} \mapsto \mathbb{R}^d$  if there exists a known  $\beta_h : \mathcal{H} \mapsto \mathbb{R}^d, h \in [H]$  such that for all  $f \in \mathcal{H}$  and  $(s_h, a_h) \in \mathcal{S} \times \mathcal{A}$  we have that:

$$d^{\pi_f}(s_h, a_h) = \langle \beta_h(f), \phi_h(s_h, a_h) \rangle.$$

Here  $d^{\pi_f}$  denotes the occupancy measure under policy  $\pi_f$ .

It is known that low occupancy complexity model is Bilinear class with

$$\begin{aligned} X_h(g) &= \beta_h(g) \\ W_h(g) &= \sum_{s \in \mathcal{S}, a \in \mathcal{A}} \phi_h(s, a) (Q_{h,g}(s, a) - r(s, a) - \mathbb{E}_{s' \sim \mathbb{P}_h(\cdot | s, a)} [V_{h+1,g}(s')]). \end{aligned}$$

The estimation policies can be chosen as  $\pi_{\text{est}}(f) = \pi_f$  and the discrepancy measure is the Bellman error:

$$l_f(o_h, g) = Q_{h,g}(s_h, a_h) - r_h - V_{h+1,g}(s_{h+1}).$$

We consider Low rank Multi-task Bilinear class where each MDP  $\mathcal{M}_m$  is low occupancy complexity model, i.e.

$$d_m^{\pi_{m,f}}(s_h, a_h) = \langle \beta_{m,h}(f), \phi_{m,h}(s_{m,h}, a_{m,h}) \rangle,$$

and there exist  $B_h \in \mathbb{R}^{d \times k}$  and features  $\nu_{m,h} : \mathcal{S} \times \mathcal{A} \mapsto \mathbb{R}^d$  such that  $\phi_{m,h} = B_h \nu_{m,h}$ . The hypothesis set is chosen as  $\mathcal{G} = \mathcal{H}_1 \otimes \dots \otimes \mathcal{H}_M$ . Notice that

$$W_{m,h}(g) = B_h \left( \sum_{s \in \mathcal{S}, a \in \mathcal{A}} \nu_h(s, a) (Q_{h,g}(s, a) - r(s, a) - \mathbb{E}_{s' \sim \mathbb{P}_h(\cdot | s, a)} [V_{h+1,g}(s')]) \right).$$

Then we use the fixed feature map  $X_{m,h} = \beta_{m,h}$ . Denoting  $\mathcal{V}_{m,h}$  as a feature class to capture  $\nu_{m,h}$  and  $\mathcal{B} = \mathcal{N}(\mathbb{R}^{d \times k}, \epsilon)$  where  $\mathcal{N}(\mathbb{R}^{d \times k}, \epsilon)$  denotes the  $\epsilon$ -covering of  $\mathbb{R}^{d \times k}$ , we set the feature class  $\mathcal{V}$  induced by  $\otimes_{m \in [M], h \in [H]} \mathcal{V}_{m,h}$  in which  $\nu_{m,h}$  defines the map  $v_{m,h} : \mathcal{G} \mapsto \mathbb{R}^k$  in the following way:

$$v_{m,h}(g) = \sum_{s \in \mathcal{S}_m, a \in \mathcal{A}_m} \nu_{m,h}(s, a) (Q_{m,h,g}(s, a) - r(s, a) - \mathbb{E}_{s' \sim \mathbb{P}_{m,h}(\cdot | s, a)} [V_{m,h+1,g}(s')]).$$

Therefore  $W_{m,h} = B_h v_{m,h}$ . We thus have the following result.

**Corollary A.2.** Consider Low-rank Multi-task Bilinear class where each MDP  $\mathcal{M}_m$  is low occupancy complexity model with

$$d_m^{\pi_{m,f}}(s_h, a_h) = \langle \beta_{m,h}(f), \phi_{m,h}(s_{m,h}, a_{m,h}) \rangle,$$

and there exist  $B_h \in \mathbb{R}^{d \times k}$  and features  $\nu_{m,h} : \mathcal{S} \times \mathcal{A} \mapsto \mathbb{R}^d$  such that  $\phi_{m,h} = B_h \nu_{m,h}$ . Denote  $\mathcal{V}_{m,h}$  as a feature class to capture  $\nu_{m,h}$  and set the feature class  $\mathcal{V}$  induced by  $\otimes_{m \in [M], h \in [H]} \mathcal{V}_{m,h}$ . Under Assumption 5.2, there exists an algorithm that with probability at least  $1 - \delta$  finds a set of policies  $\{\pi_m\}_{m \in [M]}$  such that

$$\sum_{m=1}^M V_{m,1}^{\pi_m^*}(s_1) - \sum_{m=1}^M V_{m,1}^{\pi_m}(s_1) \leq \epsilon$$

with

$$O\left(\frac{H^6 M^2 d(Mk + dk \log(1/\epsilon) + \log(|\mathcal{V}| |\mathcal{G}| / \delta))}{\epsilon^2}\right)$$

trajectories.

*Remark A.3.* Using Bilin-UCB to learn each task individually, it takes

$$O\left(\frac{H^6 M^3 d^2 \log(|\mathcal{G}|/\delta)}{\epsilon^2}\right)$$

trajectories to learn a set of policies  $\{\pi_m\}_{m \in [M]}$  such that

$$\sum_{m=1}^M V_{m,1}^{\pi_m^*}(s_1) - \sum_{m=1}^M V_{m,1}^{\pi_m}(s_1) \leq \epsilon.$$

Therefore, if the cardinality of the feature set  $\mathcal{V}$  is not greater than  $e^{O(Md)}$ , Algorithm 1 achieves sample complexity improvement comparing to single-task learning.

**FLAMBE** Feature selection Agarwal et al. (2020) setting is an extension of linear MDP where the features are all unknown.

**Definition A.4** (Feature Selection). An MDP  $\mathcal{M}$  is feature selection model if there exist unknown functions  $\mu_h^* : \mathcal{S} \mapsto \mathbb{R}^d$  and unknown features  $\phi_h^* : \mathcal{S} \times \mathcal{A} \mapsto \mathbb{R}^d$  such that for all  $h \in [H]$  and  $(s, a, s') \in \mathcal{S} \times \mathcal{A} \times \mathcal{S}$

$$\mathbb{P}_h(s'|s, a) = \langle \mu_h^*(s'), \phi^*(s, a) \rangle.$$

Using the function class  $\Phi$  to capture  $\phi^*$  and function class  $\mathcal{H} = \mathcal{H}_1 \otimes \cdots \otimes \mathcal{H}_H$  to capture the target Q-function  $Q^*$  where specifically

$$\mathcal{H}_h = \{w^\top \phi(s, a) : \|w\|_1 \leq C_W, \phi \in \Phi\},$$

it is known that the feature selection model is an instance of Bilinear class with

$$\begin{aligned} X_h(g) &= \mathbb{E}_{\pi_f}[\phi^*(s_{h-1}, a_{h-1})] \\ W_h(g) &= \sum_{s \in \mathcal{S}} \mu_h^*(s, a) (V_{h,g}(s) - r(s, \pi_g(s)) - \mathbb{E}_{s' \sim \mathbb{P}_h(\cdot|s, \pi_g(s))} [V_{h+1,g}(s')]). \end{aligned}$$

The estimation policy is uniform over the action set  $\pi_{\text{est}} = \text{Unif}(\mathcal{A})$  and the discrepancy measure is defined as

$$l_f(o_h, g) = \frac{\mathbb{1}(a_h = \pi_g(s_h))}{1/A} (Q_{h,g}(s_h, a_h) - r_h - V_{h+1,g}(s_{h+1})).$$

We consider Low rank Multi-task Bilinear class where each MDP  $M_m$  is feature selection model with  $\mathbb{P}_{m,h} = \langle \mu_{m,h}^*(s'), \phi^*(s, a) \rangle$  ( $\phi^*$  is shared among tasks) and there exists  $B_h^* : \mathcal{S} \mapsto \mathbb{R}^{d \times k}$  and  $\nu_{m,h}^* : \mathcal{S} \mapsto \mathbb{R}^k$  such that  $\mu_{m,h}^* = B_h^* \nu_{m,h}^*$ . We can therefore use the hypothesis class  $\mathcal{G} = \mathcal{H}_1 \otimes \cdots \otimes \mathcal{H}_M$  where  $\mathcal{H}_m$  is defined similarly to capture the Q-function  $Q^*$ . In addition, consider function class  $\Phi$  to capture  $\phi^*$ ,  $\mathcal{B}$  to capture  $B_h^*$ , and  $\mathcal{V}$  to capture  $\nu_{m,h}^*$ . Notice that every  $\nu_{m,h} \in \mathcal{V}$  defines the map  $v_{m,h} : g \mapsto \mathbb{R}^k$  in the following way:

$$v_{m,h}(g) = \sum_{s \in \mathcal{S}_m, a \in \mathcal{A}_m} \nu_{m,h}(s, a) (V_{h,g}(s) - r(s, \pi_g(s)) - \mathbb{E}_{s' \sim \mathbb{P}_h(\cdot|s, \pi_g(s))} [V_{h+1,g}(s')]).$$

Therefore we have  $W_{m,h} = B_h v_{m,h}$ . Notice that each  $(\phi, B_h)_{h \in [H], m \in [M]}$  will define the expectation  $\mathbb{E}_{\pi_{m,g}}^m$  (via  $\mathbb{P}_h(s'|s, a) = \langle \mu_h(s'), \phi(s, a) \rangle$  with  $\mu_{m,h} = B_h \nu_{m,h}$ ). Finally, we set  $\mathcal{X}$  induced by  $\Phi \otimes \mathcal{B} \otimes \mathcal{V}$  where the feature  $X_{m,h}(g)$  can be computed for each  $g \in \mathcal{G}$  as follows:

$$X_{m,h}(g) = \mathbb{E}_{\pi_{m,f}}^m[\phi(s_{h-1}, a_{h-1})].$$

We thus have the following result.

**Corollary A.5.** Consider Low-rank Multi-task Bilinear class where each MDP  $M_m$  is feature selection model with  $\mathbb{P}_{m,h} = \langle \mu_{m,h}^*(s'), \phi^*(s, a) \rangle$  ( $\phi^*$  is shared among tasks) and there exists  $B_h^* : \mathcal{S} \mapsto \mathbb{R}^{d \times k}$  and  $\nu_{m,h}^* : \mathcal{S} \mapsto \mathbb{R}^k$  such that  $\mu_{m,h}^* = B_h^* \nu_{m,h}^*$ . Consider function class  $\Phi$  to

capture  $\phi^*$ ,  $\mathcal{B}$  to capture  $B_h^*$ , and  $\mathcal{V}$  to capture  $v_{m,h}^*$ . Under Assumption 5.2, there exists an algorithm that with probability at least  $1 - \delta$  finds a set of policies  $\{\pi_m\}_{m \in [M]}$  such that

$$\sum_{m=1}^M V_{m,1}^{\pi_m^*}(s_1) - \sum_{m=1}^M V_{m,1}^{\pi_m}(s_1) \leq \epsilon$$

using

$$O\left(\frac{H^6 M^2 d(Mk + \log(|\mathcal{B}||\Phi||\mathcal{V}|/\delta))}{\epsilon^2}\right)$$

trajectories.

## B PROOF OF THEOREM 5.3

*Proof.* Fix  $\lambda = R^2$ . We have

$$\begin{aligned} & \sum_{m=1}^M V_{m,1}^{\pi_m^*}(s_1) - \sum_{m=1}^M V_{m,1}^{\pi_{m,g^{(t_0)}}}(s_1) \\ & \leq \sum_{m=1}^M V_{m,1,g^{(t_0)}}(s_1) - \sum_{m=1}^M V_{m,1}^{\pi_{m,g^{(t_0)}}}(s_1) \\ & \leq \sum_{m=1}^M \sum_{h=1}^H |\langle B_h^*(g^{(t_0)})v_{m,h}^*(g^{(t_0)}) - B_h^*(g^*)v_{m,h}^*(g^*), X_{m,h}^*(g^{(t_0)}) \rangle|, \end{aligned} \quad (7)$$

where the first step is from Lemma C.2 and the second step is from Lemma C.3.

Fix  $h \in [H]$ . We use Hölder's inequality,

$$\begin{aligned} & \sum_{m=1}^M |\langle B_h^*(g^{(t_0)})v_{m,h}^*(g^{(t_0)}) - B_h^*(g^*)v_{m,h}^*(g^*), X_{m,h}^*(g^{(t_0)}) \rangle| \\ & \leq \left( \sum_{m=1}^M \|B_h^*(g^{(t_0)})v_{m,h}^*(g^{(t_0)}) - B_h^*(g^*)v_{m,h}^*(g^*)\|_{\Sigma_{m,h}^{(t_0)}}^2 \right)^{1/2} \cdot \left( \sum_{m=1}^M \|X_{m,h}^*(g^{(t_0)})\|_{(\Sigma_{m,h}^{(t_0)})^{-1}}^2 \right)^{1/2}. \end{aligned}$$

By the confidence set in Line 3 and Lemma C.1, we have

$$\begin{aligned} & \sum_{m=1}^M \|B_h^*(g^{(t_0)})v_{m,h}^*(g^{(t_0)}) - B_h^*(g^*)v_{m,h}^*(g^*)\|_{\Sigma_{m,h}^{(t_0)}}^2 \\ & \leq 2 \sum_{\tau=1}^{t_0-1} \sum_{m=1}^M \left( \langle B_h^{(g^{(t_0)})}(g^{(t_0)})v_{m,h}^{(g^{(t_0)})}(g^{(t_0)}) - B_h^{(g^{(t_0)})}(g^{(t_0)})v_{m,h}^{(g^{(t_0)})}(\widetilde{g^{(t_0)}}), X_{m,h}^{(g^{(t_0)})}(g^{(\tau)}) \rangle \right)^2 \\ & \quad + 2 \sum_{\tau=1}^{t_0-1} \sum_{m=1}^M \left( \langle B_h^*(g^{(t_0)})v_{m,h}^*(g^{(t_0)}) - B_h^*(g^*)v_{m,h}^*(g^*), X_{m,h}^*(g^{(\tau)}) \rangle \right. \\ & \quad \left. - \langle B_h^{(g^{(t_0)})}(g^{(t_0)})v_{m,h}^{(g^{(t_0)})}(g^{(t_0)}) - B_h^{(g^{(t_0)})}(g^{(t_0)})v_{m,h}^{(g^{(t_0)})}(\widetilde{g^{(t_0)}}), X_{m,h}^{(g^{(t_0)})}(g^{(\tau)}) \rangle \right)^2 \\ & \leq 4R^2. \end{aligned}$$

By Lemma C.4, we have

$$\sum_{m=1}^M \|X_{m,h}^*(g^{(t_0)})\|_{(\Sigma_{m,h}^{(t_0)})^{-1}}^2 \leq 2.$$

Therefore, we combine the above to get

$$\sum_{m=1}^M |\langle B_h^*(g^{(t_0)})v_{m,h}^*(g^{(t_0)}) - B_h^*(g^*)v_{m,h}^*(g^*), X_{m,h}^*(g^{(t_0)}) \rangle| \leq 16R.$$

Plugging this into Eq. (7) completes the proof.  $\square$

## C SUPPORTING LEMMA

The following Lemma is the key concentration result on  $(v_{m,h}^{(g)}, B_h^{(g)}, X_{m,h}^{(g)})$ .

**Lemma C.1.** *With probability at least  $1 - \delta$ , the following holds for all  $h \in [H]$  and  $g \in \mathcal{G}$*

$$\sum_{\tau=1}^{t-1} \sum_{m=1}^M \left( \langle B_h^*(g)v_{m,h}^*(g) - B_h^*(g^*)v_{m,h}^*(g^*), X_{m,h}^*(g^{(\tau)}) \rangle - \langle B_h^{(g)}(g)v_{m,h}^{(g)}(g) - B_h^{(g)}(\tilde{g})v_{m,h}^{(g)}(\tilde{g}), X_{m,h}^{(g)}(g^{(\tau)}) \rangle \right)^2 \leq R^2,$$

where for each  $g \in \mathcal{G}$ ,  $(v_{1:M,1:H}^{(g)}, B_{1:H}^{(g)}, X_{1:M,1:H}^{(g)}, \tilde{g})$  are defined by

$$(v_{1:M,h}^{(g)}, B_h^{(g)}, X_{1:M,h}^{(g)}, \tilde{g}) = \arg \min_{v_{1:M,h} \in \mathcal{V}_h, B_h \in \mathcal{B}_h, X_{1:M,h} \in \mathcal{X}_h, \tilde{g} \in \mathcal{G}} \sum_{\tau=1}^{t-1} \sum_{m=1}^M \left( \mathbb{E}_{(s,a,s') \sim \mathcal{D}_{m,h}^{(\tau)}} [l_{m,h,g^{(\tau)}}(s, a, s', g)] - \langle B_h(g)v_{m,h}(g) - B_h(\tilde{g})v_{m,h}(\tilde{g}), X_{m,h}(g^{(\tau)}) \rangle \right)^2, \forall h \in [H].$$

*Proof.* Fix  $h \in [H]$ ,  $g \in \mathcal{G}$ , and  $t \in [T]$ . Let  $\alpha_{m,h} = (\alpha_{m,h,1}, \dots, \alpha_{m,h,t-1})^\top \in \mathbb{R}^{t-1}$  and  $\hat{\alpha}_{m,h} = (\hat{\alpha}_{m,h,1}, \dots, \hat{\alpha}_{m,h,t-1})^\top \in \mathbb{R}^{t-1}$  where

$$\begin{aligned} \alpha_{m,h,\tau} &= \langle B_h^*(g)v_{m,h}^*(g) - B_h^*(g^*)v_{m,h}^*(g^*), X_{m,h}^*(g^{(\tau)}) \rangle \\ \hat{\alpha}_{m,h,\tau} &= \langle B_h^{(g)}(g)v_{m,h}^{(g)}(g) - B_h^{(g)}(\tilde{g})v_{m,h}^{(g)}(\tilde{g}), X_{m,h}^{(g)}(g^{(\tau)}) \rangle \end{aligned}$$

and let  $\xi_{m,h} = (\xi_{m,h,1}, \dots, \xi_{m,h,t-1})^\top \in \mathbb{R}^{t-1}$  where

$$\xi_{m,h,\tau} = \mathbb{E}_{(s,a,s') \sim \mathcal{D}_{m,h}^{(\tau)}} [l_{m,h,g^{(\tau)}}(s, a, s', g)] - \mathbb{E}_{a_{0:h} \sim \pi_{m,g^{(\tau)}}} [l_{m,h,g^{(\tau)}}(s, a, s', g)].$$

We know that  $\xi_{m,h,1}, \dots, \xi_{m,h,t-1}$  is a stochastic process adapted to filtration  $\{\mathcal{H}_\tau\}_{\tau=1}^{t-1}$  and  $\xi_{m,h,\tau}$  is conditionally  $\sigma$ -sub-Gaussian with variance  $\sigma^2 \leq H^2 \cdot n_0^{-1}$ . We have the basic inequality

$$\sum_{m=1}^M \|\alpha_{m,h} - \hat{\alpha}_{m,h}\|^2 \leq \sum_{m=1}^M \xi_{m,h}^\top (\alpha_{m,h} - \hat{\alpha}_{m,h}). \quad (8)$$

Notice that the matrix  $(B_h^*(g)v_{1,h}^*(g) - B_h^*(g^*)v_{1,h}^*(g^*), \dots, B_h^*(g)v_{M,h}^*(g) - B_h^*(g^*)v_{M,h}^*(g^*)) \in \mathbb{R}^{d \times M}$  has rank at most  $2k$ . We can rewrite it as  $\tilde{B}_h \cdot (\tilde{v}_{1,h}, \dots, \tilde{v}_{M,h})$  where  $\tilde{B}_h \in \mathbb{R}^{d \times 2k}$  is an orthonormal matrix with and  $\tilde{v}_{m,h} \in \mathbb{R}^{2k}$ . Similarly we rewrite the matrix  $(B_h^{(g)}(g)v_{1,h}^{(g)}(g) - B_h^{(g)}(\tilde{g})v_{1,h}^{(g)}(\tilde{g}), \dots, B_h^{(g)}(g)v_{M,h}^{(g)}(g) - B_h^{(g)}(\tilde{g})v_{M,h}^{(g)}(\tilde{g})) \in \mathbb{R}^{d \times M}$  as  $\hat{B}_h \cdot (\hat{v}_{1,h}, \dots, \hat{v}_{M,h})$  where  $\hat{B}_h \in \mathbb{R}^{d \times 2k}$  is an orthonormal matrix with and  $\hat{v}_{m,h} \in \mathbb{R}^{2k}$ . Then we have

$$\alpha_{m,h} - \hat{\alpha}_{m,h} = \begin{pmatrix} (X_{m,h}^*(g^{(1)}))^\top \\ \vdots \\ (X_{m,h}^*(g^{(t-1)}))^\top \end{pmatrix} \cdot \tilde{B}_h \cdot \tilde{v}_{m,h} - \begin{pmatrix} (X_{m,h}^{(g)}(g^{(1)}))^\top \\ \vdots \\ (X_{m,h}^{(g)}(g^{(t-1)}))^\top \end{pmatrix} \cdot \hat{B}_h \cdot \hat{v}_{m,h}.$$

Let  $\beta_{m,h} = (\tilde{v}_{m,h}^\top, \hat{v}_{m,h}^\top)^\top \in \mathbb{R}^{4k}$  and

$$U_{m,h} = \begin{pmatrix} (X_{m,h}^*(g^{(1)}))^\top \\ \vdots \\ (X_{m,h}^*(g^{(t-1)}))^\top \end{pmatrix} \cdot \tilde{B}_h - \begin{pmatrix} (X_{m,h}^{(g)}(g^{(1)}))^\top \\ \vdots \\ (X_{m,h}^{(g)}(g^{(t-1)}))^\top \end{pmatrix} \cdot \hat{B}_h \in \mathbb{R}^{(t-1) \times 4k},$$

then  $\alpha_{m,h} - \hat{\alpha}_{m,h} = U_{m,h} \beta_{m,h}$ . Let  $\Lambda_{m,h} = U_{m,h}^\top U_{m,h} + \lambda \cdot I$ , then Cauchy-Schwarz inequality implies

$$\begin{aligned} \sum_{m=1}^M \xi_{m,h}^\top (\alpha_{m,h} - \hat{\alpha}_{m,h}) &\leq \sum_{m=1}^M \|\xi_{m,h}^\top U_{m,h}\|_{\Lambda_{m,h}^{-1}} \|\beta_{m,h}\|_{\Lambda_{m,h}} \\ &\leq \sqrt{\left( \sum_{m=1}^M \|\xi_{m,h}^\top U_{m,h}\|_{\Lambda_{m,h}^{-1}}^2 \right) \cdot \left( \sum_{m=1}^M \|\beta_{m,h}\|_{\Lambda_{m,h}}^2 \right)}. \end{aligned} \quad (9)$$

For  $\sum_{m=1}^M \|\beta_{m,h}\|_{\Lambda_{m,h}}^2$ , notice that

$$\begin{aligned} \left( \sum_{m=1}^M \|\beta_{m,h}\|_{\Lambda_{m,h}}^2 \right) &= \sum_{m=1}^M \|\alpha_{m,h} - \hat{\alpha}_{m,h}\|^2 + \lambda \cdot \sum_{m=1}^M \|\beta_{m,h}\|^2 \\ &\leq \sum_{m=1}^M \|\alpha_{m,h} - \hat{\alpha}_{m,h}\|^2 + 4M\lambda C_W. \end{aligned} \quad (10)$$

Fix  $v_{m,h}^{(g)}, B_h^{(g)}, X_{m,h}^{(g)}, \tilde{g}$ , then  $\{U_{m,h,\tau}\}_{\tau=1}^{t-1}$  is a stochastic process adapted to filtration  $\{\mathcal{H}_\tau\}_{\tau=1}^{t-1}$ . Therefore, by Lemma 2 in Hu et al. (2021), we know that the following holds with probability at least  $1 - \delta_1$

$$\begin{aligned} \sum_{m=1}^M \|\xi_{m,h}^\top U_{m,h}\|_{\Lambda_{m,h}^{-1}}^2 &\leq \sigma^2 \cdot \sum_{m=1}^M \log \left( \frac{\det(\Lambda_{m,h}) \det(\lambda \cdot I)^{-1}}{\delta^2} \right) \\ &\leq H^2 \cdot n_0^{-1} \cdot (Mk \cdot \log(C_X/\lambda) + \log(1/\delta_1)). \end{aligned}$$

Taking union bound for all  $v_{1:M,h}^{(g)}, B_h^{(g)}, X_{1:M,h}^{(g)}, \tilde{g} \in (\mathcal{V}_h, \mathcal{B}_h, \mathcal{X}_h, \mathcal{G})$ , we have that with probability at least  $1 - \delta_0$

$$\sum_{m=1}^M \|\xi_{m,h}^\top U_{m,h}\|_{\Lambda_{m,h}^{-1}}^2 \leq H^2 \cdot n_0^{-1} \cdot (Mk \cdot \log(C_X/\lambda) + \log(|\mathcal{V}||\mathcal{B}||\mathcal{X}||\mathcal{G}|/\delta_0)). \quad (11)$$

Combining Eq. (11), Eq. (10), Eq. (9), and Eq. (8), we come to the following with probability at least  $1 - \delta_0$

$$\begin{aligned} &\sum_{m=1}^M \|\alpha_{m,h} - \hat{\alpha}_{m,h}\|^2 \\ &\leq \sqrt{H^2 \cdot n_0^{-1} \cdot (Mk \cdot \log(C_X/\lambda) + \log(|\mathcal{V}||\mathcal{B}||\mathcal{X}||\mathcal{G}|/\delta)) \cdot \left( \sum_{m=1}^M \|\alpha_{m,h} - \hat{\alpha}_{m,h}\|^2 + 4m\lambda C_W \right)}. \end{aligned}$$

Solving the above inequality and setting  $\lambda = \frac{2H^2(Mk \cdot \log(C_X/\lambda) + \log(|\mathcal{V}||\mathcal{B}||\mathcal{X}||\mathcal{G}|/\delta))}{Mn_0C_W}$ , with probability at least  $1 - \delta_0$ ,

$$\begin{aligned} &\sum_{m=1}^M \|\alpha_{m,h} - \hat{\alpha}_{m,h}\|^2 \\ &\leq \frac{2H^2(Mk \cdot \log(\frac{C_X}{\lambda}) + \log(\frac{|\mathcal{V}||\mathcal{B}||\mathcal{X}||\mathcal{G}|}{\delta}))}{n_0} + 4\sqrt{\frac{H(Mk \cdot \log(\frac{C_X}{\lambda}) + \log(\frac{|\mathcal{V}||\mathcal{B}||\mathcal{X}||\mathcal{G}|}{\delta}))m\lambda C_W}{n_0}} \\ &\leq \frac{8H^2(Mk \cdot \log(Mn_0C_WC_X) + \log(|\mathcal{V}||\mathcal{B}||\mathcal{X}||\mathcal{G}|/\delta_0))}{n_0}. \end{aligned}$$

Finally, taking union bound for all  $h \in [H]$ ,  $g \in \mathcal{G}$ , and  $t \in [T]$  completes the proof.  $\square$

The following Lemma establishes optimism of  $g^{(t)}$  by showing that the true model  $g^*$  always lies in the confidence set.

**Lemma C.2.** *With probability at least  $1 - \delta$ ,  $g^*$  satisfies the constraints in Line 3. Therefore,*

$$\sum_{m=1}^M V_{m,1,g^{(t)}}(s_1) \geq \sum_{m=1}^M V_{m,1}^{\pi_m^*}(s_1)$$

*Proof.* Applying Lemma C.1 for  $g = g^*$ , we know that outside the failure event  $\mathcal{E}$ ,

$$\begin{aligned} & \sum_{\tau=1}^{t-1} \sum_{m=1}^M \left( \langle B_h^{(g)}(g) v_{m,h}^{(g)}(g) - B_h^{(g)}(\tilde{g}) v_{m,h}^{(g)}(\tilde{g}), X_{m,h}^{(g)}(g^{(\tau)}) \rangle \right)^2 \\ & \leq \sum_{\tau=1}^{t-1} \sum_{m=1}^M \left( \langle B_h^*(g) v_{m,h}^*(g) - B_h^*(g^*) v_{m,h}^*(g^*), X_{m,h}^*(g^{(\tau)}) \rangle - \langle B_h^{(g)}(g) v_{m,h}^{(g)}(g) - B_h^{(g)}(\tilde{g}) v_{m,h}^{(g)}(\tilde{g}), X_{m,h}^{(g)}(g^{(\tau)}) \rangle \right)^2 \\ & \leq R^2. \end{aligned}$$

This means that  $g^*$  belongs to the confidence set  $\mathcal{G}^{(t)}$ ,  $\forall t \in [T]$  in Line 3.  $\square$

The following result decouples  $\sum_{m=1}^M V_{m,1,g}(s_1) - \sum_{m=1}^M V_{m,1}^{\pi_m,g}(s_1)$  into sum of Bellman errors. This is a simple extension of Lemma 5.5 in Du et al. (2021).

**Lemma C.3.** *For any  $g \in \mathcal{G}$  we have*

$$\begin{aligned} & \sum_{m=1}^M V_{m,1,g}(s_1) - \sum_{m=1}^M V_{m,1}^{\pi_m,g}(s_1) \\ & \leq \sum_{m=1}^M \sum_{h=1}^H |\langle B_h^*(g) v_{m,h}^*(g) - B_h^*(g^*) v_{m,h}^*(g^*), X_{m,h}^*(g) \rangle|. \end{aligned}$$

Finally, we show the coverage of  $\Sigma_{m,h}^{(t)} = \sum_{\tau=1}^t X_h^*(g^{(\tau)})(X_h^*(g^{(\tau)}))^{\top} + \lambda I$ .

**Lemma C.4.** *Let  $\Sigma_{m,h}^{(t)} = \sum_{\tau=1}^t X_h^*(g^{(\tau)})(X_h^*(g^{(\tau)}))^{\top} + \lambda I$ . There exists  $t_0 \in [T]$  such that*

$$\sum_{m=1}^M \|X_h^*(g^{(t_0)})\|_{(\Sigma_{m,h}^{(t_0)})^{-1}}^2 \leq 2.$$

*Proof.* We use the following Elliptic Potential Lemma.

**Lemma C.5** (Elliptic Potential Lemma, Abbasi-Yadkori et al. (2011)). *Let  $\Sigma_{m,h}^{(t)} = \sum_{\tau=1}^t X_h^*(g^{(\tau)})(X_h^*(g^{(\tau)}))^{\top} + \lambda I$ . Then we have*

$$\sum_{t=1}^T \log(1 + \|X_h^*(g^{(t)})\|_{(\Sigma_{m,h}^{(t)})^{-1}}^2) \leq \frac{1}{T} \cdot \log \frac{\det(\Sigma_{m,h}^{(T)})}{\det(\lambda I)} \leq d \cdot \log(1 + \frac{TC_X^2}{\lambda d})$$

Set  $T = 8HMd \log(1 + \frac{MC_X^2}{\lambda})$ , then

$$\min_{t \in [T]} \sum_{m=1}^M \log(1 + \|X_h^*(g^{(t)})\|_{(\Sigma_{m,h}^{(t)})^{-1}}^2) \leq \frac{1}{T} \cdot M \cdot d \cdot \log(1 + \frac{TC_X^2}{\lambda d}) \leq \log 2.$$

For this  $t_0$  where the above holds,  $\max_{m \in [M]} \|X_h^*(g^{(t_0)})\|_{(\Sigma_{m,h}^{(t_0)})^{-1}}^2 \leq 1$ , which implies

$$\sum_{m=1}^M \|X_h^*(g^{(t_0)})\|_{(\Sigma_{m,h}^{(t_0)})^{-1}}^2 \leq 2 \sum_{m=1}^M \log(1 + \|X_h^*(g^{(t_0)})\|_{(\Sigma_{m,h}^{(t_0)})^{-1}}^2) \leq 2.$$

□
